# Supplementary material for: Optimization of Vero Cells Grown on a Polymer Fiber Carrier in a Disposable Bioreactor for Inactivated Coxsackievirus A16 Vaccine Development
Source: MDPI journal article supplement (doi:10.3390/vaccines9060613), 2021-06-07
Supplement: s1 [file s1]

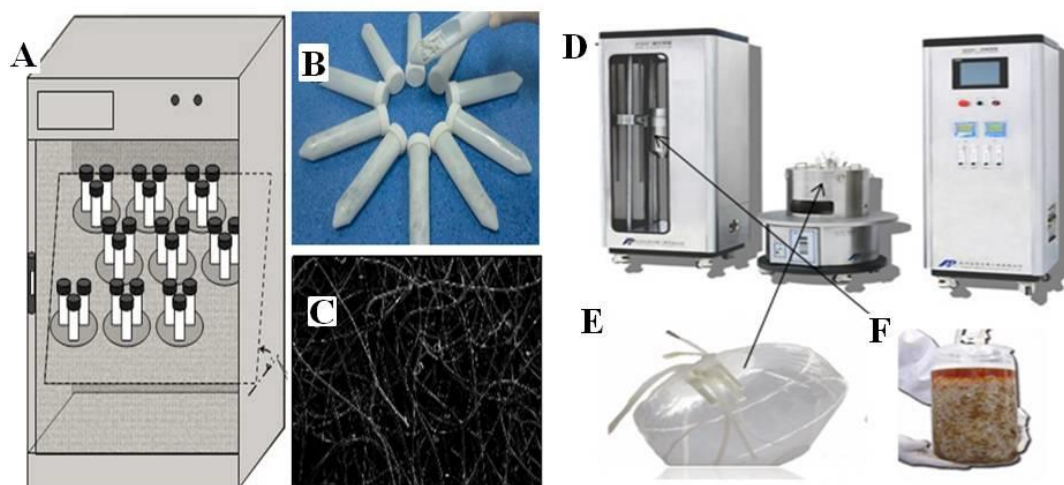

**Figure S1.** Illustration of the mini-bioreactor and ACPB system. **(A)** Self-rotating incubator with vessels. **(B)** Vessels packed with a polymer fiber carrier. **(C)** Photomicrograph (200 $\times$ ) of polymer fiber carrier. **(D)** AmProtein Current Perfusion Bioreactor. **(E)** 5 L disposable plastic perfusion column. **(F)** 10 L disposable plastic bioreactor bag with DO, pH, and temperature probes.
